# Supplementary material for: On the mechanism to suppress dark current via blending with an all-inorganic perovskite precursor in colloidal quantum dot photodetectors
Source: Royal Society of Chemistry journal article supplement (doi:10.1039/d3tc02894a), 2023-01-01
Supplement: d3tc02894a1.pdf [file d3tc02894a1.pdf]

## Supporting Information

### **On the mechanism to suppress dark current via blending all-inorganic perovskite precursor for colloidal quantum dots photodetectors**

Ying Wu<sup>1</sup>, Shengyi Yang<sup>1\*</sup>, Feiyang Sun<sup>1</sup>, Xiaoxuan Liu<sup>1</sup>, Zhenheng Zhang<sup>1</sup>, Yi Tang<sup>2</sup>, Yurong Jiang<sup>2</sup>, Bingsuo Zou<sup>3</sup>

<sup>1</sup>Beijing Key Lab of Nanophotonics and Ultrafine Optoelectronic Systems, School of Physics, Beijing Institute of Technology, Beijing 100081, P. R. China

<sup>2</sup>School of Optics and Photonics, Beijing Institute of Technology, Beijing 100081, P. R. China

<sup>3</sup>School of Physical Science and Technology, Guangxi University, Nanning 530004, P. R. China

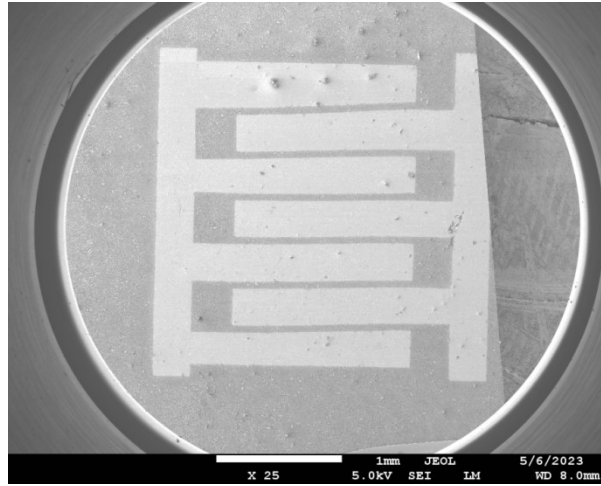

**Fig. S1** SEM image of Ag interdigital electrode for the device active area

100 nm of Ag interdigital electrode was deposited on the top of the  $\text{PbS}:\text{CsPbBr}_3$  hybrid film, with a channel width of  $50\ \mu\text{m}$  and an active area of  $0.0075\ \text{cm}^2$ , as shown in Fig. S1. Si substrate act as one electrode and the Ag interdigital electrode act as another electrode.

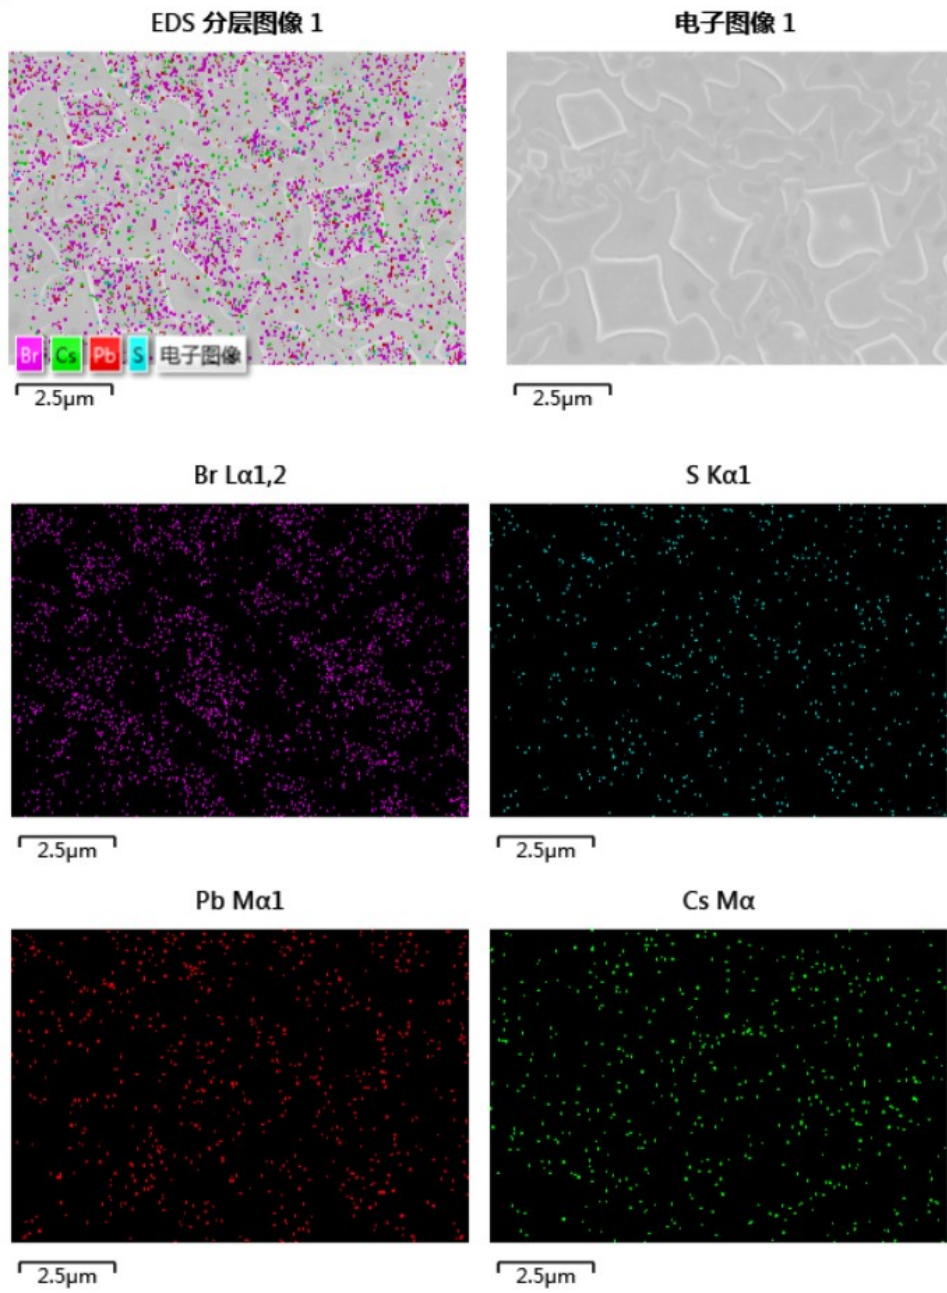

Fig. S2 EDS image of PbS:CsPbBr<sub>3</sub> hybrid film with K<sub>v</sub>=1:2

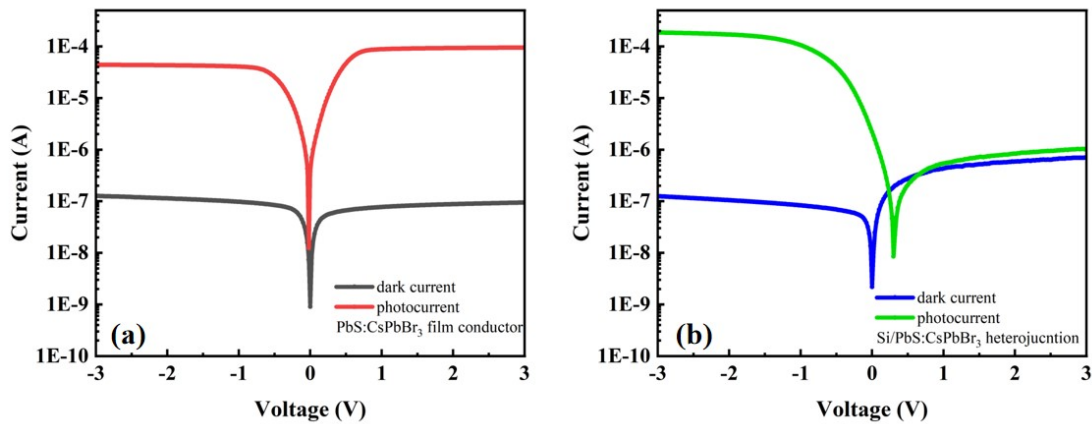

**Fig. S3** I-V curves of photodetectors Ag/PbS:CsPbBr<sub>3</sub>/Ag (a) and Si/PbS:CsPbBr<sub>3</sub>/Ag (b) under 3.3 mW/cm<sup>2</sup> 980 nm illumination.

I-V curves of photodetectors Ag/PbS:CsPbBr<sub>3</sub>/Ag are shown in Fig. S3(a). Obviously, PbS:CsPbBr<sub>3</sub> bulk-heterojunction film shows inapparent rectifying characteristics. I-V curves of bulk-heterojunction photodetector Si/PbS:CsPbBr<sub>3</sub>/Ag are shown in Fig. S2(b), the typical I-V curves imply a heterojunction is formed between Si and PbS:CsPbBr<sub>3</sub> hybrid film.

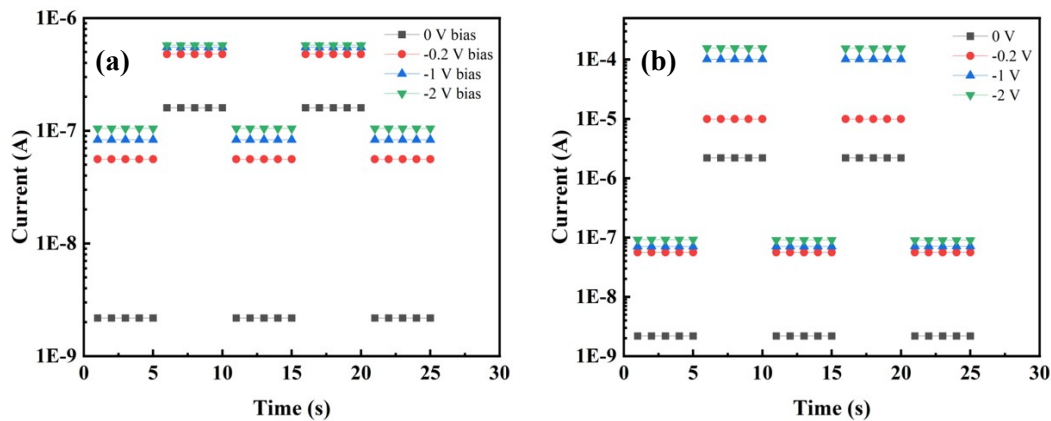

**Fig. S4** I-t curves of photodetector Si/PbS:CsPbBr<sub>3</sub>/Ag under 980 nm illumination with an intensity of 4.8 μW/cm<sup>2</sup> (a) and 3.3 mW/cm<sup>2</sup> (b).

I-t curves of the bulk heterojunction photodetector Si/PbS:CsPbBr<sub>3</sub>/Ag under 4.8 μW/cm<sup>2</sup> 980 nm illumination are shown in Fig. S3(a), the photocurrent is already saturated at a small bias of -0.2 V. I-t curves of bulk heterojunction photodetectors

Si/PbS:CsPbBr<sub>3</sub>/Ag under 3.3 mW/cm<sup>2</sup> 980 nm illumination are shown in Fig. S3(b), the photocurrent saturated at -1 V.

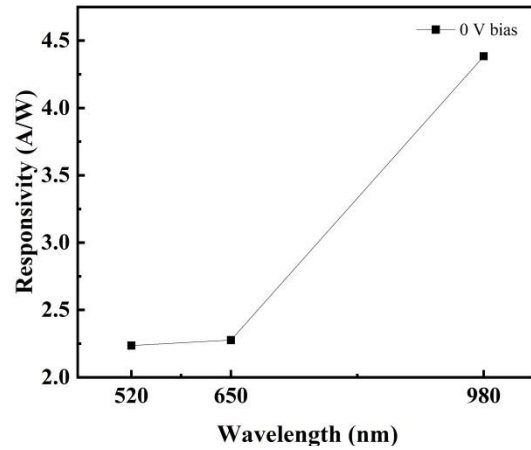

**Fig. S5** Responsivity as the function of Wavelength (520 nm, 650 nm, 980 nm)

Responsivities under different wavelengths illuminations at 0 V bias are shown in Fig. S5, however, different illuminations are with different intensities, so the curves are merely for reference.

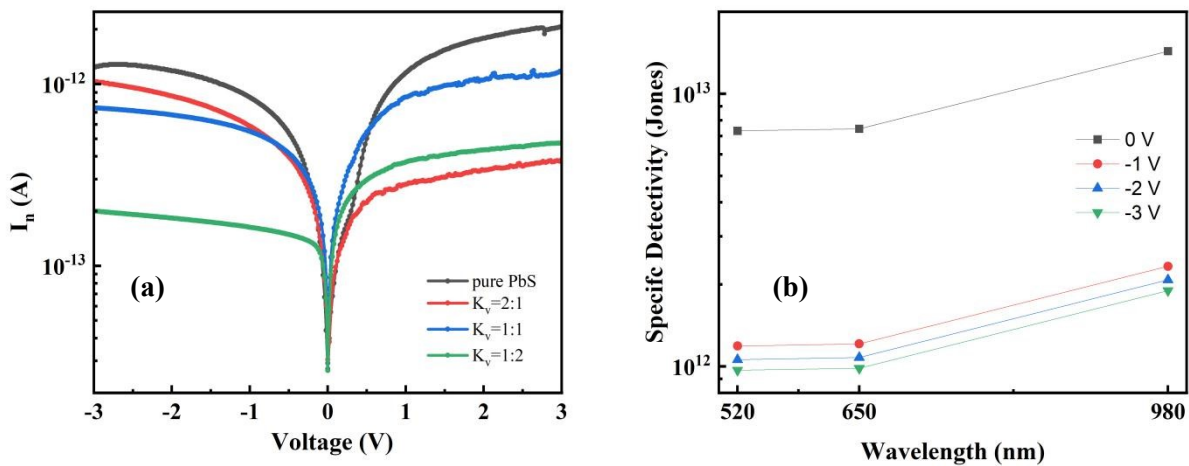

**Fig. S6** noise current of bulk-heterojunction photodetectors Si/PbS:CsPbBr<sub>3</sub>/Ag in which the active layer is in different volume ratio  $K_V$  under different bias **(a)**; specific detectivity based on noise current **(b)**
